# Supplementary material for: Acetylation of C-terminal lysines modulates protein turnover and stability of Connexin-32
Source: PubMed Central journal article supplement (PMC6162937; doi:10.1186/s12860-018-0173-0), 2018-09-29
Supplement: 12860_2018_173_MOESM2_ESM.pdf [file 12860_2018_173_MOESM2_ESM.pdf]

**Figure S3.**

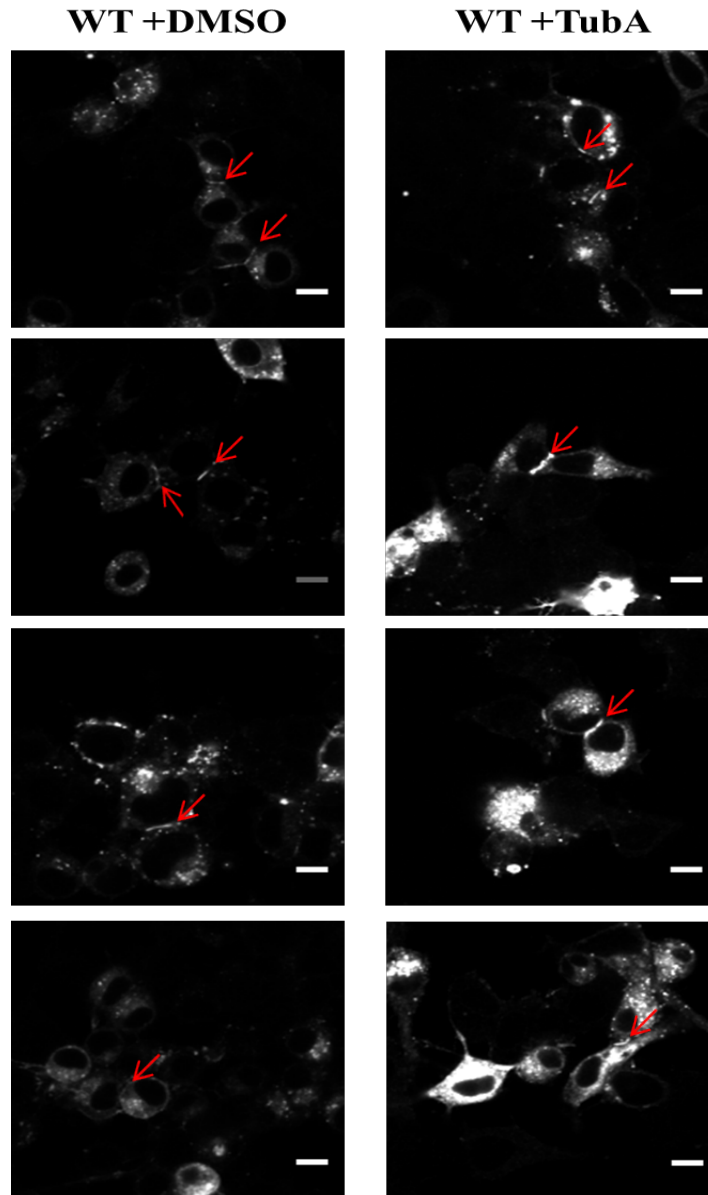

**Figure S3. C-terminal lysines influence Cx32 localization and HDACi response.** Additional representative images of WT Cx32 expressing N2a cells (+/- TubA) shown in Figure S2.
