# Supplementary material for: Acetylation of C-terminal lysines modulates protein turnover and stability of Connexin-32
Source: PubMed Central journal article supplement (PMC6162937; doi:10.1186/s12860-018-0173-0), 2018-09-29
Supplement: 12860_2018_173_MOESM5_ESM.pdf [file 12860_2018_173_MOESM5_ESM.pdf]

**Figure S1.**

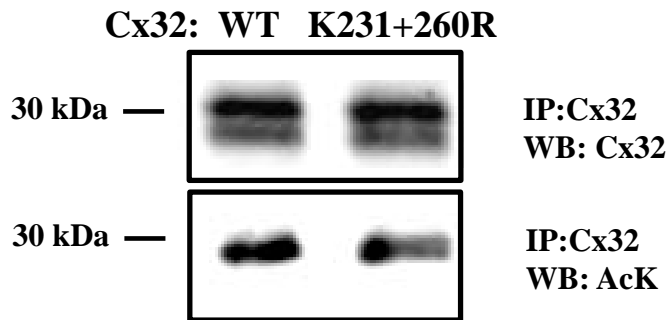

**Figure S1. Mutation of K231 and K260 does not eliminate acetylation.** N2a cells were transfected with pIRESeGFP-Cx32 WT or K231+260R for 48 hours as described in methods section, then treated overnight with 20  $\mu$ M Tubastatin. Cx32 was immunoprecipitated and blotted with indicated antibodies.
